# Supplementary material for: Identify the Virus-like Models for COVID-19 as Bio-Threats: Combining Phage Display, Spectral Detection and Algorithms Analysis
Source: MDPI journal article supplement (doi:10.3390/ijms24043209), 2023-02-06

## Supplementary Information

### S1. Sequencing validation for the S gene

GGCCCAGCCGGCCATGTTTGTTTTCTTGTTTTATTGCCACTAGTCTCTAGTCAGT  
GTGTTAATCTTACAACCAGAACTCAATTACCCCCTGCATACACTAATTCTTTCACA  
CGTGGTGTTTATTACCCTGACAAAGTTTTTCAGATCCTCAGTTTTACATTCAACTCA  
GGACTTGTTCTTACCTTTCTTTTCCAATGTTACTTGGTTCCATGCTATACATGTCTC  
TGGGACCAATGGTACTAAGAGGTTTGATAACCCTGTCCTACCATTTAATGATGGT  
GTTTATTTTGCTTCCACTGAGAAGTCTAACATAATAAGAGGCTGGATTTTTGGTAC  
TACTTTAGATTCGAAGACCCAGTCCCTACTTATTGTTAATAACGCTACTAATGTTG  
TTATTAAAGTCTGTGAATTTCAATTTTGTAATGATCCATTTTTGGGTGTTTATTACC  
ACAAAAACAACAAAAGTTGGATGGAAAGTGAGTTCAGAGTTTATTCTAGTGCGA  
ATAATTGCACTTTTGAATATGTCTCTCAGCCTTTTCTTATGGACCTTGAAGGAAAA  
CAGGGTAATTTCAAAAATCTTAGGGAATTTGTGTTTAAGAATATTGATGGTTATTT  
TAAAATATATTCTAAGCACACGCCTATTAATTTAGTGCGTGATCTCCCTCAGGGTT  
TTTCGGCTTTAGAACCATTGGTAGATTTGCCAATAGGTATTAACATCACTAGGTTT  
CAAACCTTTACTTGCTTTACATAGAAGTTATTTGACTCCTGGTGATTCTTCTTCAGG  
TTGGACAGCTGGTGCTGCAGCTTATTATGTGGGTATCTTCAACCTAGGACTTTTC  
TATTAAAATATAATGAAAATGGAACCATTAACAGATGCTGTAGACTGTGCACTTGA  
CCCTCTCTCAGAAACAAAGTGACGTTGAAATCCTTCACTGTAGAAAAAGGAATC  
TATCAAACCTTCTAACTTTAGAGTCCAACCAACAGAATCTATTGTTAGATTTCTCTAA  
TATTACAAACTTGTGCCCTTTTGGTGAAAGTTTTTAACGCCACCAGATTTGCATCTG  
TTTATGCTTGGAACAGGAAGAGAATCAGCAACTGTGTTGCTGATTATTCTGTCTCT  
ATATAATTCCGCATCATTTTCCACTTTTAAGTGTTATGGAGTGTCTCCTACTAAAT  
TAAATGATCTCTGCTTTACTAATGTCTATGCAGATTCATTTGTAATTAGAGGTGAT  
GAAGTCAGACAAATCGCTCCAGGGCAAACCTGGAAAGATTGCTGATTATAATTAT  
AAATTACCAGATGATTTTACAGGCTGCGTTATAGCTTGGAATTCTAACAATCTTG  
ATTCTAAGGTTGGTGGTAATTATAATTACCTGTATAGATTGTTTAGGAAGTCTAAT  
CTCAAACCTTTTGAGAGAGATATTTCAACTGAAATCTATCAGGCCGGTAGCACAC  
CTTGTAATGGTGTTGAAGGTTTTAATTGTTACTTTCCTTTACAATCATATGGTTTCC  
AACCCTAATGGTGTTGGTTACCAACCATAACAGAGTAGTAGTACTTTCTTTTGA  
ACTTCTACATGCACCAGCAACTGTTTGTGGACCTAAAAAGTCTACTAATTTGGTT  
AAAAACAAATGTGTCAATTTCAACTTCAATGGTTTAACAGGCACAGGTGTTCTTA  
CTGAGTCTAACAAAAAGTTTCTGCCTTTCCAACAATTTGGCAGAGACATTGCTGA  
CACTACTGATGCTGTCCGTGATCCACAGACACTTGAGATTCTTGACATTACACCA  
TGTTCTTTTGGTGGTGTCAGTGTTATAACACCAGGAACAAATACTTCTAACCAGG  
TTGCTGTTCTTTATCAGGATGTAACTGCACAGAAGTCCCTGTTGCTATTCATGCA

GATCAACTTACTCCTACTTGGCGTGTTTATTCTACAGGTTCTAATGTTTTTCAAAC  
ACGTGCAGGCTGTTTAATAGGGGCTGAACATGTCAACAACTCATATGAGTGTGAC  
ATACCCATTGGTGCAGGTATATGCGCTAGTTATCAGACTCAGACTAATTCTCCTC  
GGCGGGCACGTAGTGTAGCTAGTCAATCCATCATTGCCTACACTATGTCACCTGG  
TGCAGAAAATTCAGTTGCTTACTCTAATAACTCTATTGCCATACCCACAAATTTTA  
CTATTAGTGTTACCACAGAAATTCTACCAGTGTCTATGACCAAGACATCAGTAGA  
TTGTACAATGTACATTTGTGGTGATTCAACTGAATGCAGCAATCTTTTGTTGCAAT  
ATGGCAGTTTTTGTACACAATTAACCCTGCTTTAACTGGAATAGCTGTTGAACA  
AGACAAAAACACCCAAGAAGTTTTTGCACAAGTCAAACAAATTTACAAAACACC  
ACCAATTAAGATTTTTGGTGGTTTTAATTTTTTCACAAATATTACCAGATCCATCAA  
AACCAAGCAAGAGGTCATTTATTGAAGATCTACTTTTCAACAAAGTGACACTTGC  
AGATGCTGGCTTCATCAAACAATATGGTGATTGCCTTGGTGATATTGCTGCTAGA  
GACCTCATTTGTGCACAAAAGTTTAACGGCCTTACTGTTTTGCCACCTTTGCTCAC  
AGATGAAATGATTGCTCAATACACTTCTGCACTGTTAGCGGGTACAATCACTTCT  
GGTTGGACCTTTGGTGCAGGTGCTGCATTACAAATACCATTTGCTATGCAAATGG  
CTTATAGGTTTAATGGTATTGGAGTTACACAGAATGTTCTCTATGAGAACCAAAA  
ATTGATTGCCAACCAATTTAATAGTGCTATTGGCAAAATTCAAGACTCACTTTCTT  
CCACAGCAAGTGCACTTGGAAAACCTTCAAGATGTGGTCAACCAAAATGCACAAG  
CTTTAAACACGCTTGTTAAACAACCTTAGCTCCAATTTTGGTGCAATTTCAAGTGTT  
TTAAATGATATCCTTTCACGTCTTGACAAAGTTGAGGCTGAAGTGCAAATTGATA  
GGTTGATCACAGGCAGACTTCAAAGTTTGCAGACATATGTGACTCAACAATTAAT  
TAGAGCTGCAGAAATCAGAGCTTCTGCTAATCTTGCTGCTACTAAAATGTCAGAG  
TGTGTACTTGGACAATCAAAAAGAGTTGATTTTTGTGGAAAGGGCTATCATCTTA  
TGTCTTCCCTCAGTCAGCACCTCATGGTGTAGTCTTCTTGCATGTGACTTATGTC  
CCTGCACAAGAAAAGAACTTCACAACCTGCTCCTGCCATTTGTCATGATGGAAAAG  
CACACTTTCCTCGTGAAGGTGTCTTTGTTTCAAATGGCACACACTGGTTTGTAACA  
CAAAGGAATTTTTATGAACCACAAATCATTACTACAGACAACACATTTGTGTCTG  
GTAAGTGTGATGTTGTAATAGGAATTGTCAACAACACAGTTTATGATCCTTTGCA  
ACCTGAATTAGACTCATTCAAGGAGGAGTTAGATAAATATTTTAAGAATCATACA  
TCACCAGATGTTGATTTAGGTGACATCTCTGGCATTAAATGCTTCAGTTGTAAACAT  
TCAAAAAGAAATTGACCGCCTCAATGAGGTTGCCAAGAATTTAAATGAATCTCTC  
ATCGATCTCCAAGAACTTGGAAAGTATGAGCAGTATATAAAATGGCCATGGTAC  
ATTTGGCTAGGTTTTATAGCTGGCTTGATTGCCATAGTAATGGTGACAATTATGCT  
TTGCTGTATGACCAGTTGCTGTAGTTGTCTCAAGGGCTGTTGTTCTTGTGGATCCT  
GCTGCAAATTTGATGAAGACGACTCTGAGCCAGTGCTCAAAGGAGTCAAATTAC  
ATTACACATAAGCGGCCGC

## S2. Affinity analysis of Model-S

The affinity analysis of Model-S was investigated by the molecular interaction instrument ForteBio Octet K2 (SARTORIUS, Germany). Below are the Figure 1 (d) and (e) from the manuscript and the related information was shown below in Table S1.

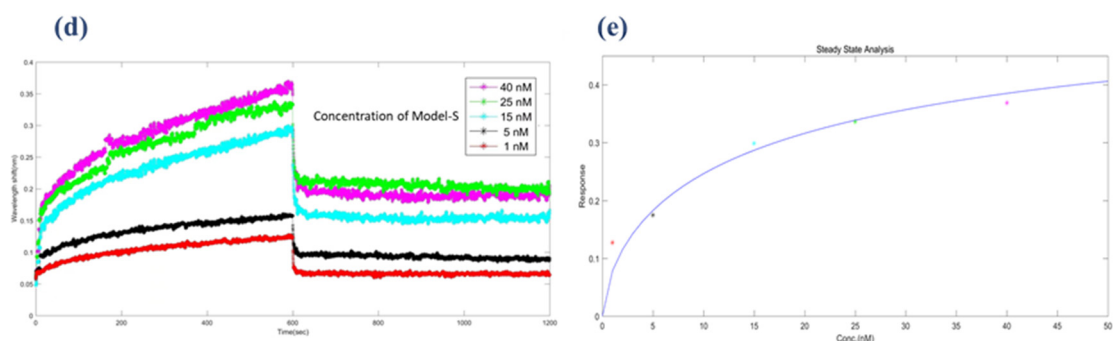

**Table S1.** Fitting results for the affinity analysis of Model-S

|                                                                                                                                                                                                                             |                                                                                            |                |
|-----------------------------------------------------------------------------------------------------------------------------------------------------------------------------------------------------------------------------|--------------------------------------------------------------------------------------------|----------------|
| $K_a = 1.426 \times 10^5 \text{ M}^{-1} \text{ s}^{-1}$<br>$K_d = 3.525 \times 10^{-4} \text{ s}^{-1}$<br>$KD = \frac{K_d}{K_a} = 2.473 \times 10^{-9} \text{ M}$<br>Affinity constant = $4.044 \times 10^8 \text{ M}^{-1}$ |                                                                                            |                |
| Binding model                                                                                                                                                                                                               | 1:1 Model<br>(Fitting one analyte in solution binding to one binding site on the surface.) |                |
| Model equation                                                                                                                                                                                                              | $\text{Response} = \frac{R_{\max} \times \text{Conc.}}{KD + \text{Conc.}}$                 |                |
| Results                                                                                                                                                                                                                     | $\chi^2/\text{DoF} = 0.0021$                                                               | $R^2 = 0.9417$ |

## S3. Results from three-dimensional fluorescence spectroscopy for the nine samples.

### (1) BSA

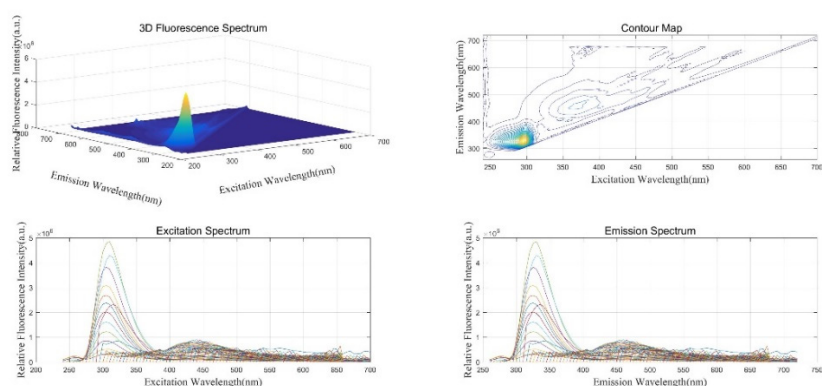

## (2) OVA

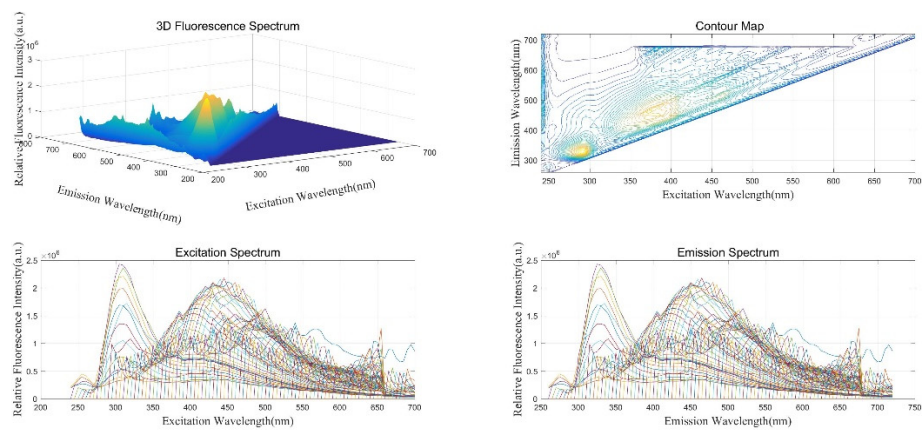

## (3) M13 phage

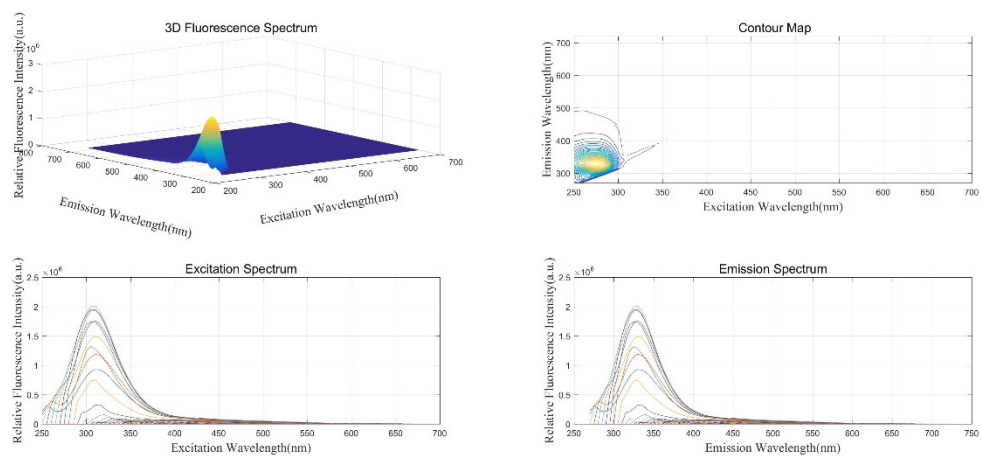

## (4) Model-N

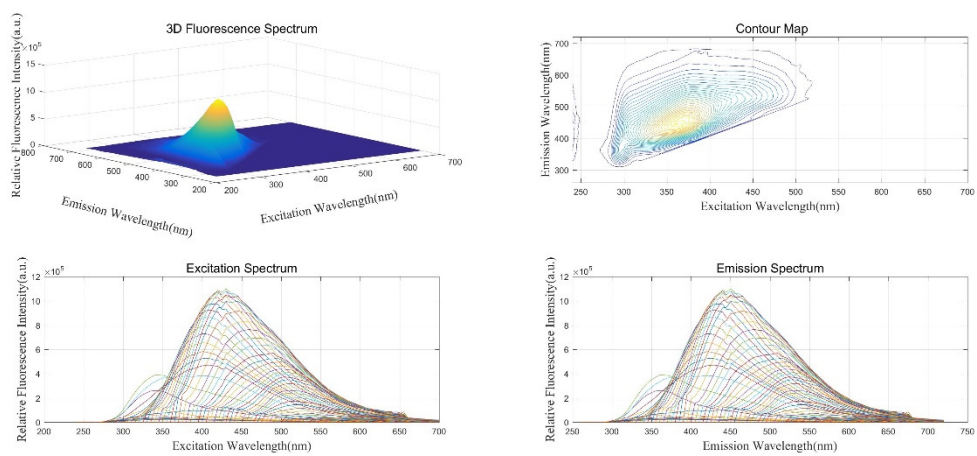

## (5) Model-S

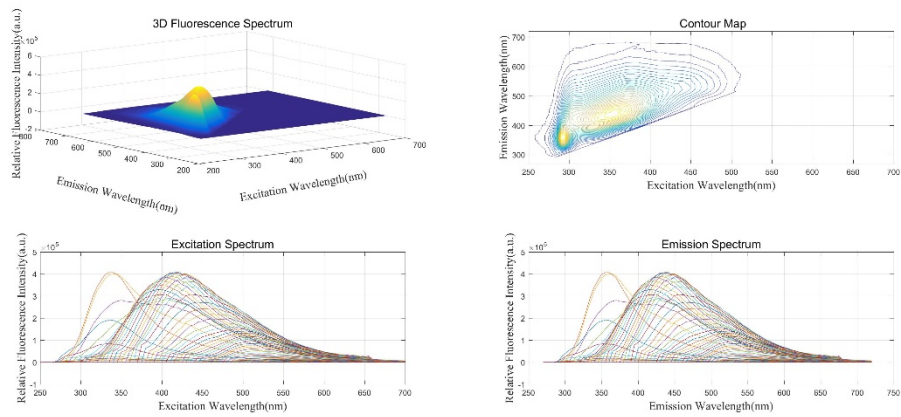

## (6) N protein

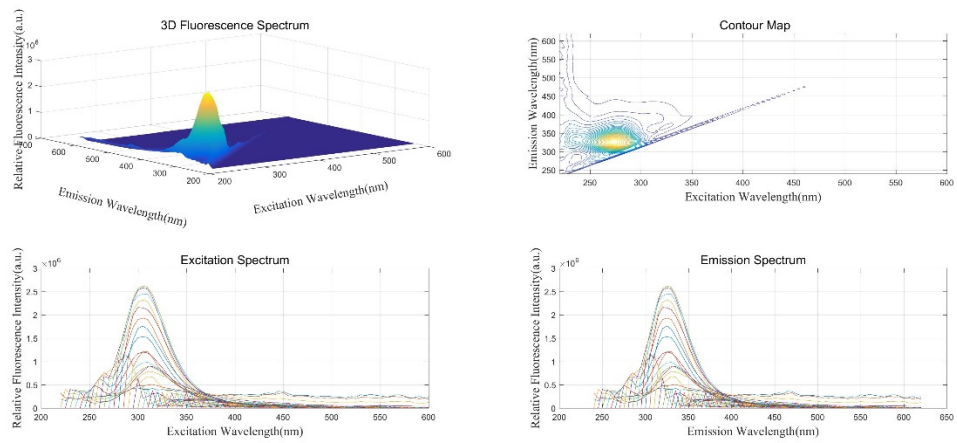

## (7) S1 protein

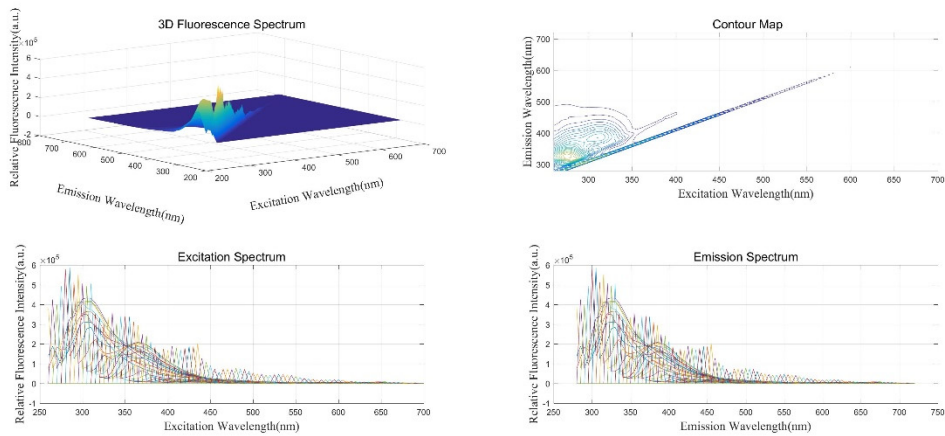

(8) S2 protein

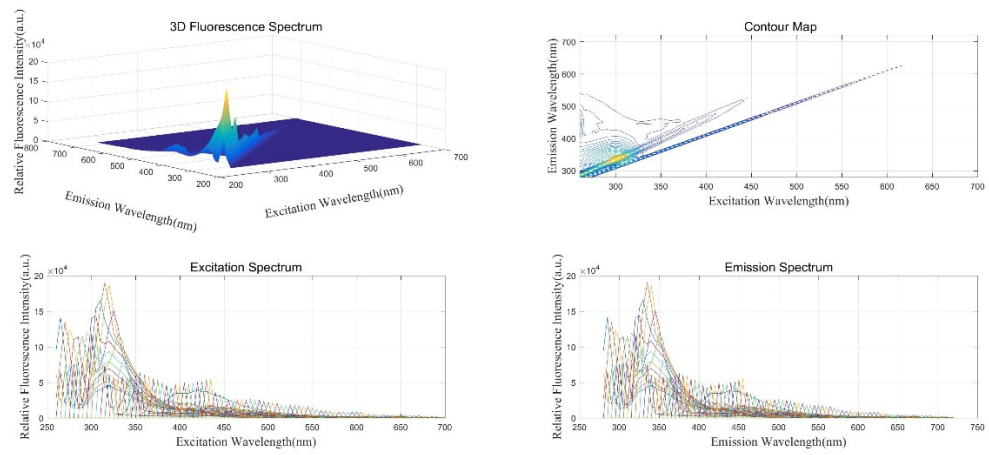

(9) *E. coli* TG1

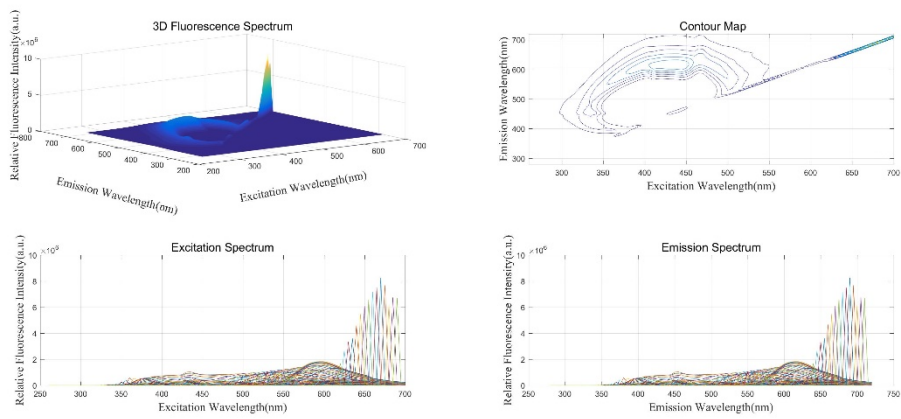

## S4. Results from Raman spectroscopy for the nine samples

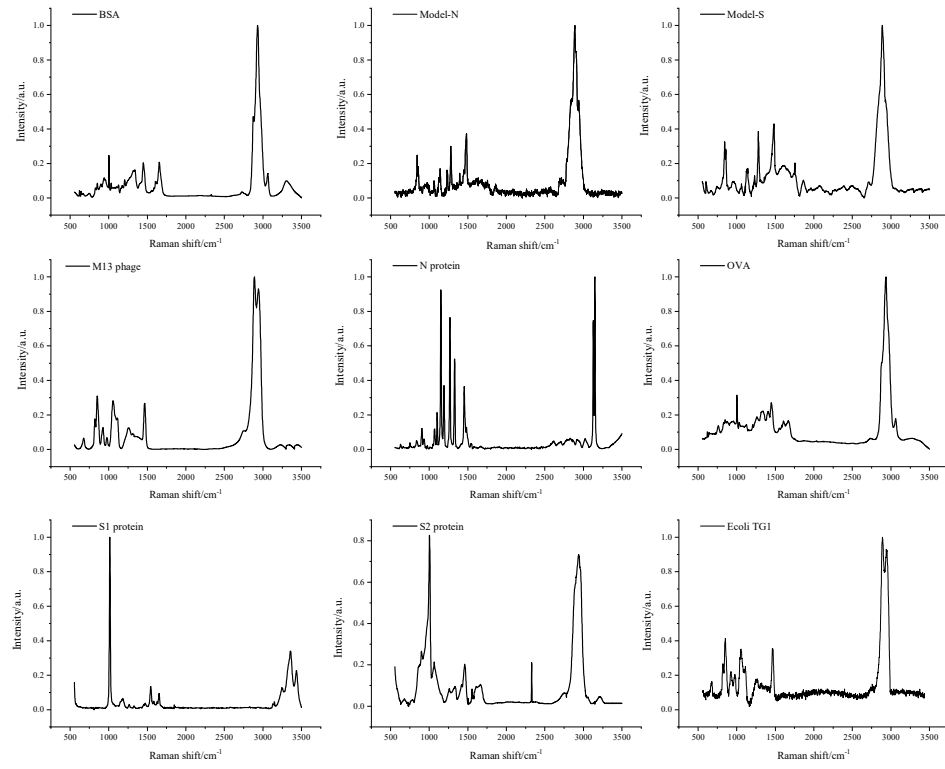

Supplement: s1 [file s1]
